# Supplementary material for: Optimization of Extraction and Refining Parameters of Oil from Dotted Gizzard Shad (Konosirus punctatus)
Source: MDPI journal article supplement (doi:10.3390/foods13081278), 2024-04-22
Supplement: s1 [file s1]

Table S1. Experimental values for the lipid yield by the Box-Behnken design.

| <b>RUN</b> | <b>A-pH</b> | <b>B-Time (h)</b> | <b>C-Temperature (°C)</b> | <b>D-Liquid-solid Ratio</b> | <b>Yield (%)</b> |
|------------|-------------|-------------------|---------------------------|-----------------------------|------------------|
| 1          | 9.00        | 2.00              | 50.00                     | 1.00                        | 71.24            |
| 2          | 10.00       | 2.50              | 50.00                     | 1.00                        | 68.49            |
| 3          | 9.00        | 3.00              | 50.00                     | 1.00                        | 69.52            |
| 4          | 9.00        | 2.50              | 40.00                     | 0.50                        | 66.47            |
| 5          | 9.00        | 2.00              | 45.00                     | 0.50                        | 64.32            |
| 6          | 9.00        | 3.00              | 45.00                     | 1.50                        | 68.31            |
| 7          | 10.00       | 2.50              | 45.00                     | 0.50                        | 65.46            |
| 8          | 9.00        | 2.50              | 45.00                     | 1.00                        | 75.01            |
| 9          | 9.00        | 2.50              | 45.00                     | 1.00                        | 75.4             |
| 10         | 10.00       | 2.00              | 45.00                     | 1.00                        | 70.69            |
| 11         | 9.00        | 2.50              | 45.00                     | 1.00                        | 74.83            |
| 12         | 8.00        | 2.50              | 50.00                     | 1.00                        | 71.28            |
| 13         | 8.00        | 2.50              | 45.00                     | 1.50                        | 70.28            |
| 14         | 9.00        | 2.50              | 40.00                     | 1.50                        | 72.51            |
| 15         | 8.00        | 2.50              | 45.00                     | 0.50                        | 64.3             |
| 16         | 8.00        | 3.00              | 45.00                     | 1.00                        | 72.61            |
| 17         | 9.00        | 2.50              | 45.00                     | 1.00                        | 74.99            |
| 18         | 10.00       | 3.00              | 45.00                     | 1.00                        | 68.94            |
| 19         | 10.00       | 2.50              | 40.00                     | 1.00                        | 73.46            |
| 20         | 9.00        | 3.00              | 45.00                     | 0.50                        | 67.89            |
| 21         | 10.00       | 2.50              | 45.00                     | 1.50                        | 66.92            |
| 22         | 8.00        | 2.50              | 40.00                     | 1.00                        | 72.33            |
| 23         | 9.00        | 2.50              | 45.00                     | 1.00                        | 74.97            |
| 24         | 9.00        | 2.50              | 50.00                     | 0.50                        | 67.53            |
| 25         | 9.00        | 3.00              | 40.00                     | 1.00                        | 73.82            |
| 26         | 9.00        | 2.00              | 45.00                     | 1.50                        | 68.88            |
| 27         | 9.00        | 2.50              | 50.00                     | 1.50                        | 66.55            |
| 28         | 8.00        | 2.00              | 45.00                     | 1.00                        | 69.55            |
| 29         | 9.00        | 2.00              | 40.00                     | 1.00                        | 71.73            |
